# Supplementary material
Source: Springer Nature journal article supplement (https://www.springermedizin.de/resource/supplementary/12905_2011_267_MOESM1_ESM.pdf/9518336)
Supplement: MOESM1 [file 9518336]

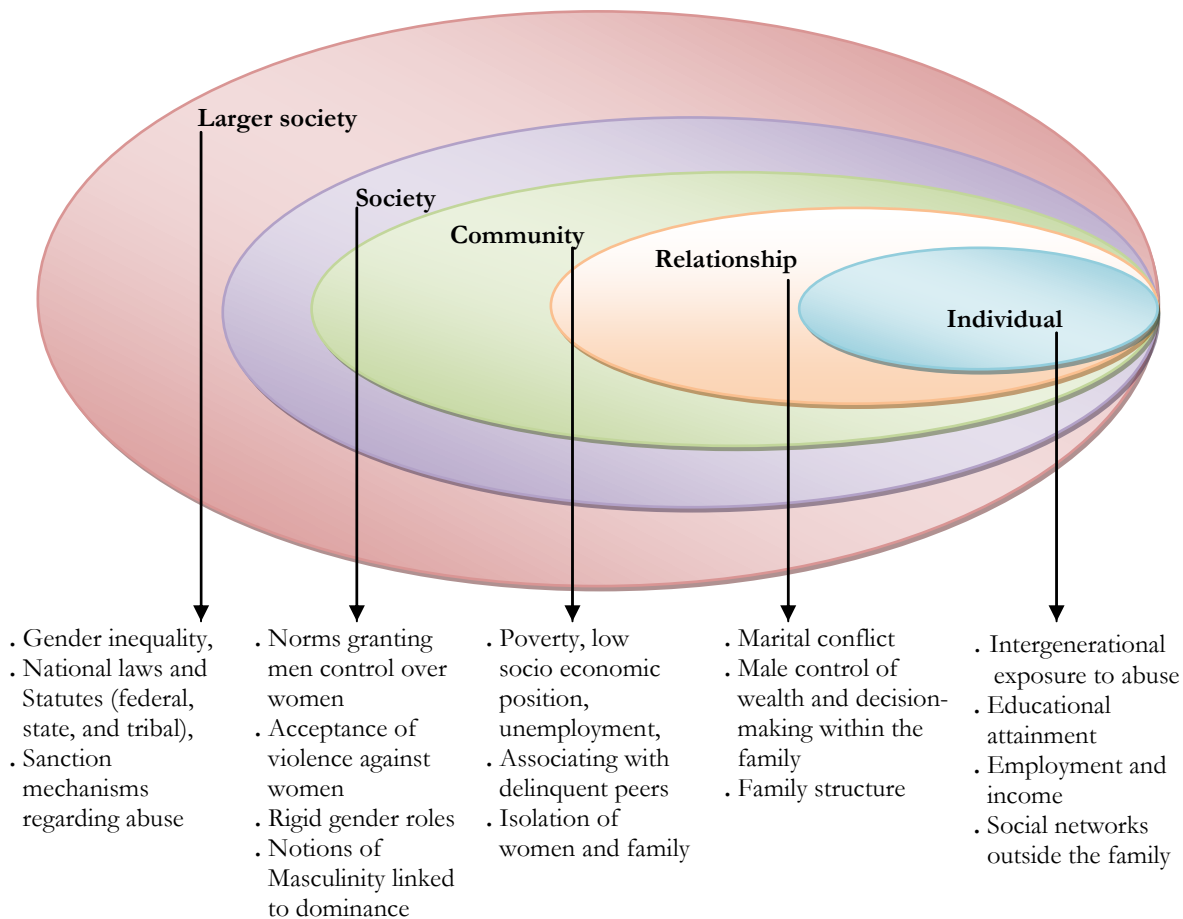

**Social ecological model** [adapted from Heise (1998)]

Heise LL, Violence against women: an integrated, ecological framework. *Violence Against Women* 1998, 4(3):262-290.
